# Supplementary material for: Chemistry of a series of heterobimetallic complexes MnIII2(CaII/SrII)X2 (X = Cl−, Br−)
Source: Royal Society of Chemistry journal article supplement (doi:10.1039/d3dt01858j), 2023-12-27
Supplement: d3dt01858j1.pdf [file d3dt01858j1.pdf]

## Supporting Information

### Chemistry of a series of heterobimetallic complexes $Mn^{III}_2(Ca^{II}/Sr^{II})X_2$ ( $X = Cl, Br$ )

Priyabrata Bhattacharya,<sup>a</sup> Riya Bag,<sup>a</sup> Ray J. Butcher,<sup>b</sup> Snehanjali Behera,<sup>c</sup> Biswajit Mondal<sup>c\*</sup> and Sanchita Goswami<sup>a\*</sup>

<sup>a</sup>Department of Chemistry, University of Calcutta, 92, A.P.C. Road, Kolkata-700009, India.

<sup>b</sup>Chemistry Department, Howard University, Washington, D.C. 20059, United States.

<sup>c</sup>Discipline of Chemistry, IIT Gandhinagar, Palaj, Gujarat - 382055, India.

| CONTENTS                                                                                                                                                                                                                                                                                 | Page No. |
|------------------------------------------------------------------------------------------------------------------------------------------------------------------------------------------------------------------------------------------------------------------------------------------|----------|
| <b>Figure S1.</b> FT-IR spectrum of complexes <b>1</b> , <b>2</b> , <b>3</b> and <b>4</b> .                                                                                                                                                                                              | S4       |
| <b>Figure S2.</b> PXRD of complexes <b>1</b> , <b>2</b> , <b>3</b> and <b>4</b> .                                                                                                                                                                                                        | S5       |
| <b>Figure S3.</b> ESI-MS spectrum of complex <b>1</b> in methanol.                                                                                                                                                                                                                       | S6       |
| <b>Figure S4.</b> ESI-MS spectrum of complex <b>2</b> in methanol.                                                                                                                                                                                                                       | S7       |
| <b>Figure S5.</b> ESI-MS spectrum of complex <b>3</b> in methanol.                                                                                                                                                                                                                       | S8       |
| <b>Figure S6.</b> ESI-MS spectrum of complex <b>4</b> in methanol.                                                                                                                                                                                                                       | S9       |
| <b>Figure S7.</b> UV-Visible absorption spectra of complexes <b>1</b> , <b>2</b> , <b>3</b> , <b>4</b> and <b>H<sub>2</sub>Vab</b> .                                                                                                                                                     | S10      |
| <b>Figure S8.</b> Crystal structure of complex <b>2</b> showing the trinuclear hetero-bimetallic core. Hydrogen atoms attached to carbon are removed for clarity. Color code: C = grey; N = blue; O = red; H = black; Cl = green; Mn <sup>III</sup> = purple; Sr <sup>II</sup> = gold.   | S11      |
| <b>Figure S9.</b> Crystal structure of complex <b>3</b> showing the trinuclear hetero-bimetallic core. Hydrogen atoms attached to carbon are removed for clarity. Color code: C = grey; N = blue; O = red; H = black; Br = brown; Mn <sup>III</sup> = purple; Ca <sup>II</sup> = yellow. | S11      |
| <b>Figure S10.</b> Crystal structure of complex <b>4</b> showing the trinuclear hetero-bimetallic core. Hydrogen atoms attached to carbon are removed for clarity. Color code: C = grey; N = blue; O = red; H = black; Br = brown; Mn <sup>III</sup> = purple; Sr <sup>II</sup> = gold.  | S12      |
| <b>Figure S11.</b> A supramolecular 2D structure of complex <b>1</b> formed by $\pi \cdots \pi$ interactions between 1D sheets along the <i>b</i> axis which are formed by O-H $\cdots$ O bonds along the <i>a</i>                                                                       | S12      |

axis.

|                                                                                                                                                                                                                                                                            |     |
|----------------------------------------------------------------------------------------------------------------------------------------------------------------------------------------------------------------------------------------------------------------------------|-----|
| <b>Figure S12.</b> Molar magnetization ( $M$ ) vs. magnetic field ( $H$ ) for complexes <b>1-4</b> at 2.0 K                                                                                                                                                                | S13 |
| <b>Figure S13.</b> Molar magnetization ( $M$ ) vs. $H/T$ plot for complexes <b>1-4</b> at 2.0 K.                                                                                                                                                                           | S14 |
| <b>Figure S14.</b> Temperature dependence of $\chi_M^{-1}$ for complexes <b>1-4</b> .                                                                                                                                                                                      | S15 |
| <b>Figure S15.</b> CV data for complex <b>2</b> (red) and its metal-free analog (black) in DMF. 3 mm glassy carbon as working, Ag/AgCl as a reference, Pt wire as a counter electrode.                                                                                     | S16 |
| <b>Figure S16.</b> Comparative time-dependent UV-Visible spectra for complex <b>2</b> : a) after the addition of water and b) after the addition of $\text{OH}^-$ .                                                                                                        | S16 |
| <b>Figure S17.</b> CV data for DMF with 200 mM $\text{OH}^-$ with (red) and without the catalyst (complex <b>2</b> ) (green) and only DMF (black dash). 3 mm glassy carbon as working, Ag/AgCl as a reference, Pt wire as a counter electrode.                             | S17 |
| <b>Figure S18.</b> Gas chromatography (GC) Trace with complex <b>2</b> . a. Time-dependent GC trace for $\text{H}_2\text{O}$ ; b. $\text{OH}^-$ oxidation. High surface area graphite rod as working, Ag/AgCl as a reference, Pt wire as a counter electrode.              | S17 |
| <b>Figure S19.</b> OCP measurement in DMF. a. OCP measurement with 1000 mM $\text{H}_2\text{O}$ ; b. with 200 mM $\text{OH}^-$ . Pt as working, Ag/AgCl as a reference, Pt wire as a counter electrode. The reference is corrected with respect to the $\text{Fc}^{+/0}$ . | S18 |
| <b>Figure S20.</b> a. Comparative CV for complex <b>2</b> , free ligand and blank carbon cloth in 1M KOH. b. time-dependent GC trace for $\text{OH}^-$ oxidation; c. Comparative CV for complex <b>2</b> , free ligand, and blank carbon cloth in pH 7 buffer.             | S18 |
| <b>Table S1.</b> Crystal refinement parameters of complexes <b>1-4</b> .                                                                                                                                                                                                   | S19 |
| <b>Table S2.</b> Selected bond lengths ( $\text{\AA}$ ) and bond angles ( $^\circ$ ) in complex <b>1</b> .                                                                                                                                                                 | S20 |
| <b>Table S3.</b> Selected bond lengths ( $\text{\AA}$ ) and bond angles ( $^\circ$ ) in complex <b>2</b> .                                                                                                                                                                 | S22 |
| <b>Table S4.</b> Selected bond lengths ( $\text{\AA}$ ) and bond angles ( $^\circ$ ) in complex <b>3</b> .                                                                                                                                                                 | S24 |
| <b>Table S5.</b> Selected bond lengths ( $\text{\AA}$ ) and bond angles ( $^\circ$ ) in complex <b>4</b> .                                                                                                                                                                 | S26 |
| <b>Table S6.</b> Bond Valence Sum (BVS) results for manganese centers in complex <b>1</b> in different oxidation states and their assignment.                                                                                                                              | S28 |
| <b>Table S7.</b> Bond Valence Sum (BVS) results for manganese centers in complex <b>2</b> in different oxidation states and their assignment.                                                                                                                              | S28 |
| <b>Table S8.</b> Bond Valence Sum (BVS) results for manganese centers in complex <b>3</b> in different oxidation states and their assignment.                                                                                                                              | S28 |

|                                                                                                                                                                                                                                                                                |     |
|--------------------------------------------------------------------------------------------------------------------------------------------------------------------------------------------------------------------------------------------------------------------------------|-----|
| <b>Table S9.</b> Bond Valence Sum (BVS) results for manganese centers in complex <b>4</b> in different oxidation states and their assignment.                                                                                                                                  | S28 |
| <b>Table S10.</b> Continuous Shape Measures (CShMs) of manganese centers in complexes <b>1</b> , <b>2</b> , <b>3</b> and <b>4</b> respectively relative to ideal 5/6–vertex polyhedral. The lowest CShMs value which corresponds to closest geometry is highlighted.           | S29 |
| <b>Table S11.</b> Continuous Shape Measures (CShMs) of calcium and strontium centers in complexes <b>1</b> , <b>3</b> and <b>2</b> , <b>4</b> respectively relative to ideal 8–vertex polyhedral. The lowest CShMs value which corresponds to closest geometry is highlighted. | S30 |
| <b>Table S12.</b> Hydrogen bond parameters found in complex <b>1</b> , (distances (Å), angles, (°)).                                                                                                                                                                           | S32 |
| <b>Table S13.</b> Hydrogen bond parameters found in complex <b>2</b> , (distances (Å), angles, (°)).                                                                                                                                                                           | S32 |
| <b>Table S14.</b> Hydrogen bond parameters found in complex <b>3</b> , (distances (Å), angles, (°)).                                                                                                                                                                           | S32 |
| <b>Table S15.</b> Hydrogen bond parameters found in complex <b>4</b> , (distances (Å), angles, (°)).                                                                                                                                                                           | S32 |
| <b>Table S16.</b> Electrochemical parameters for manganese complexes used in this study.                                                                                                                                                                                       | S33 |
| <b>Table S17.</b> Over potential values of different complexes based on the OCP values.                                                                                                                                                                                        | S33 |
| <b>Table S18.</b> OER half-wave potential of complexes with respect to NHE.                                                                                                                                                                                                    | S34 |

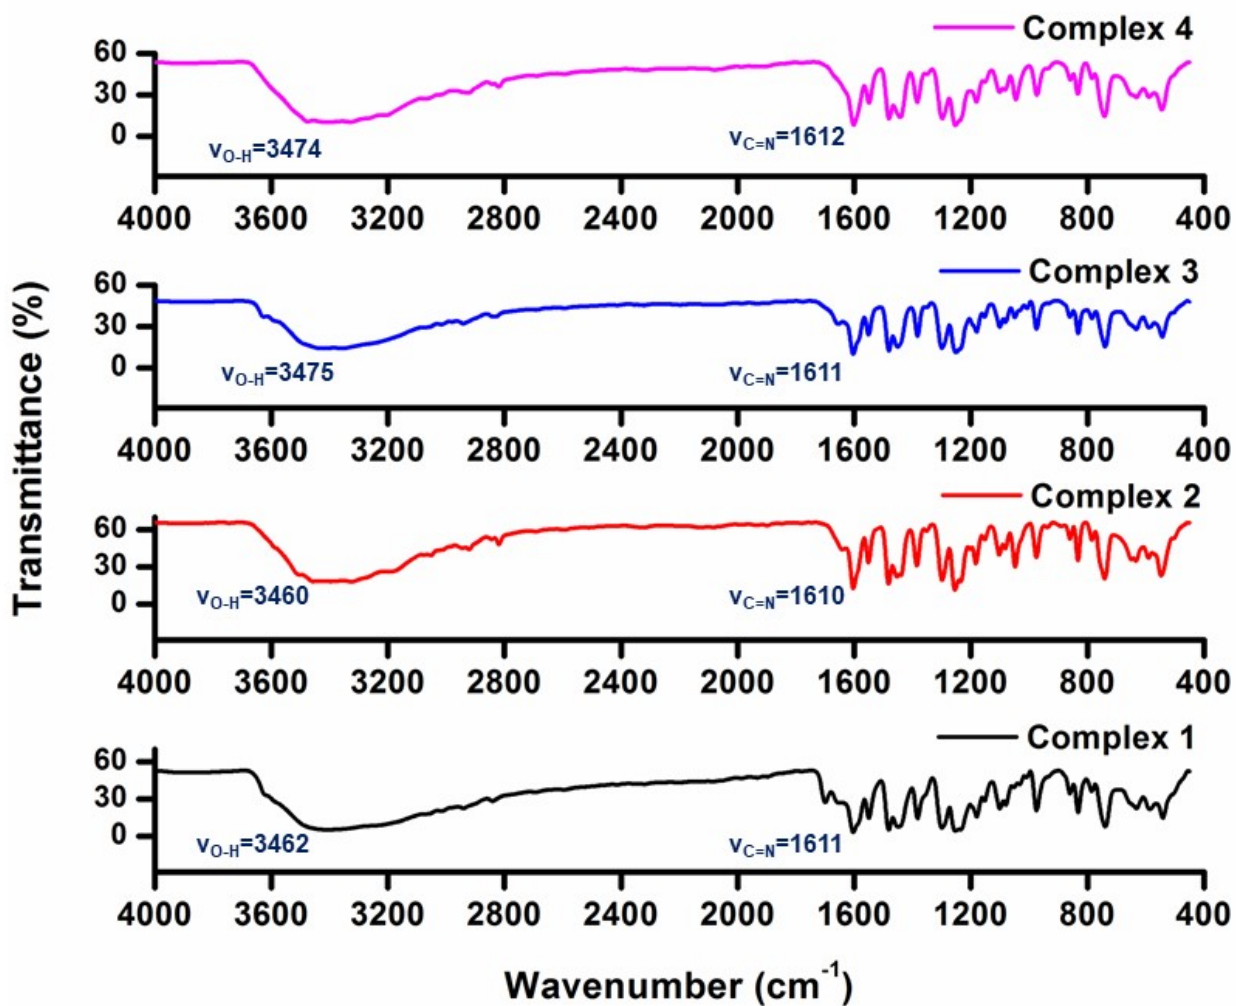

Figure S1. FT-IR spectrum of complexes 1, 2, 3 and 4.

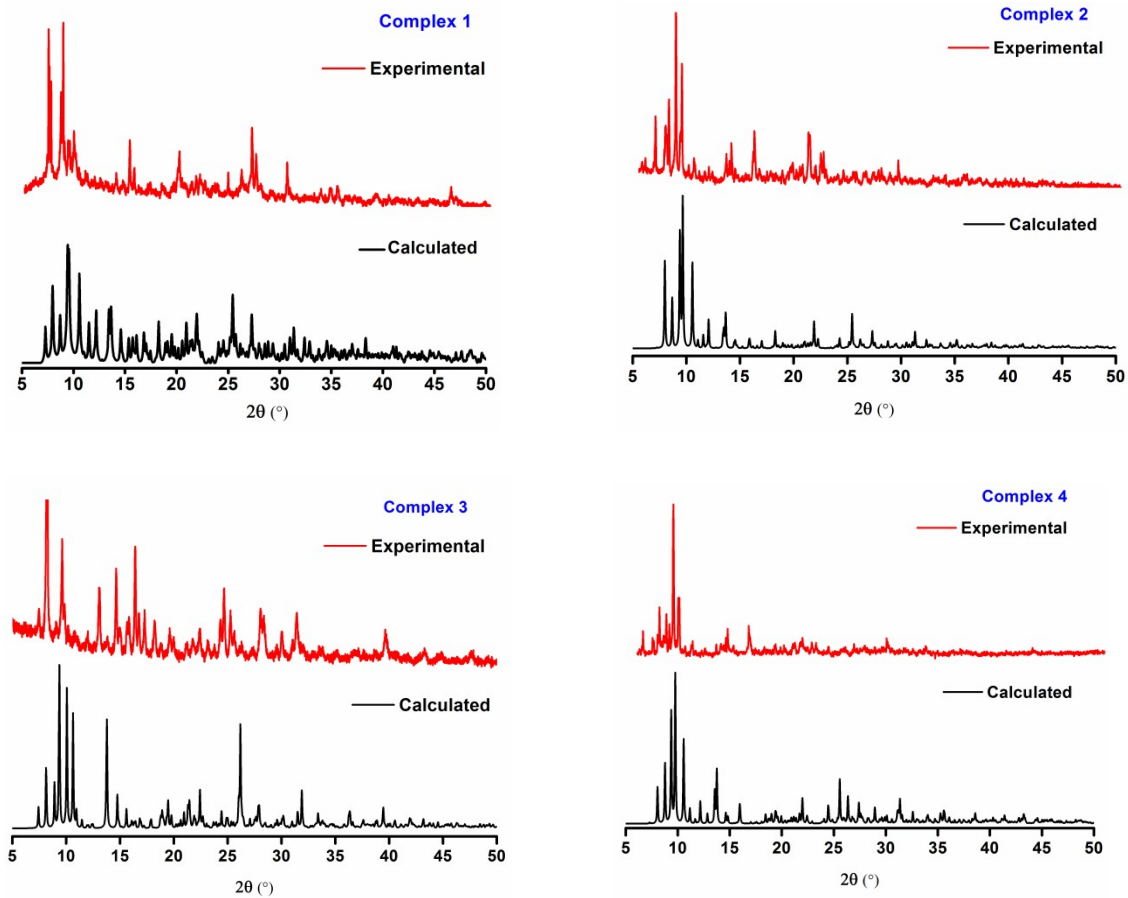

**Figure S2.** Experimental (red) and calculated (black) Powder X-ray diffraction spectrum of complexes 1, 2, 3 and 4 to determine the phase purity.

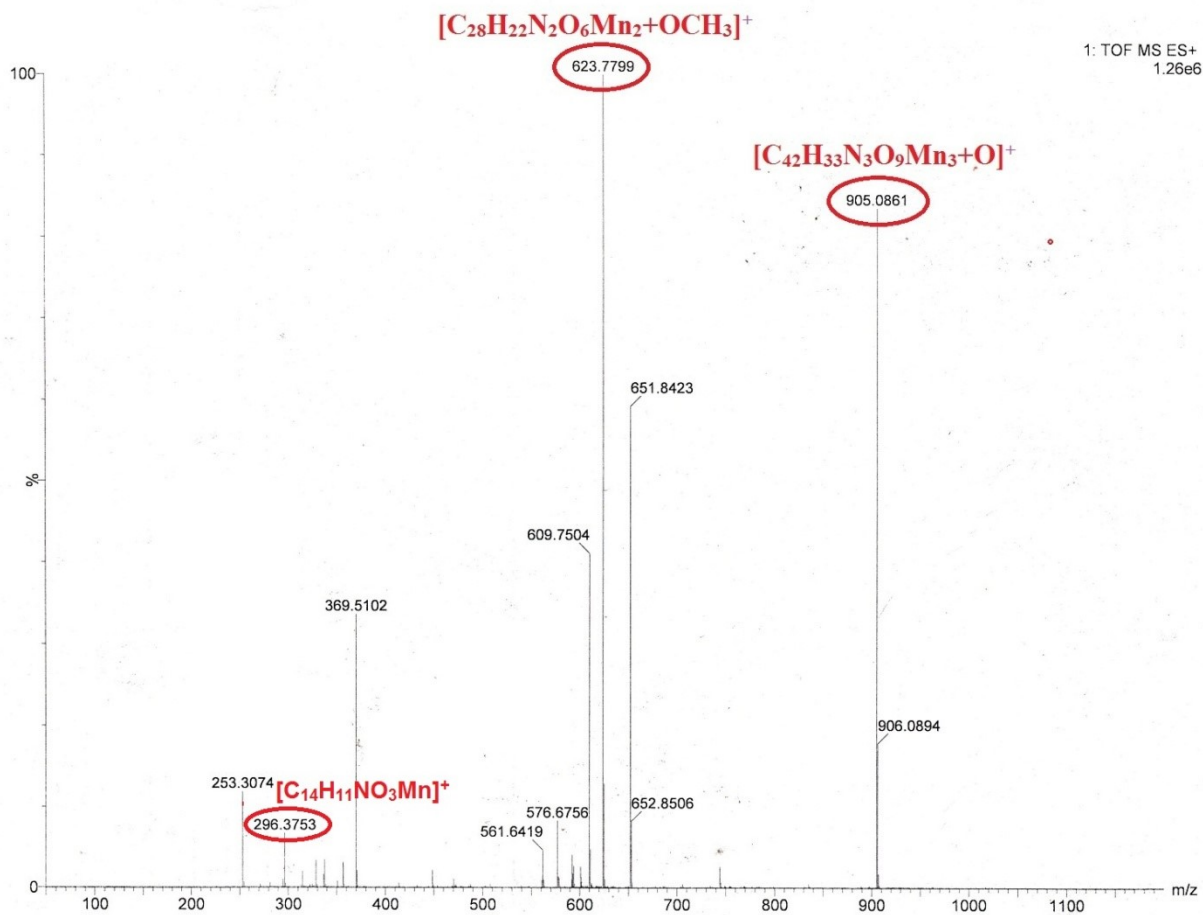

Figure S3. ESI-MS spectrum of complex 1 in methanol.

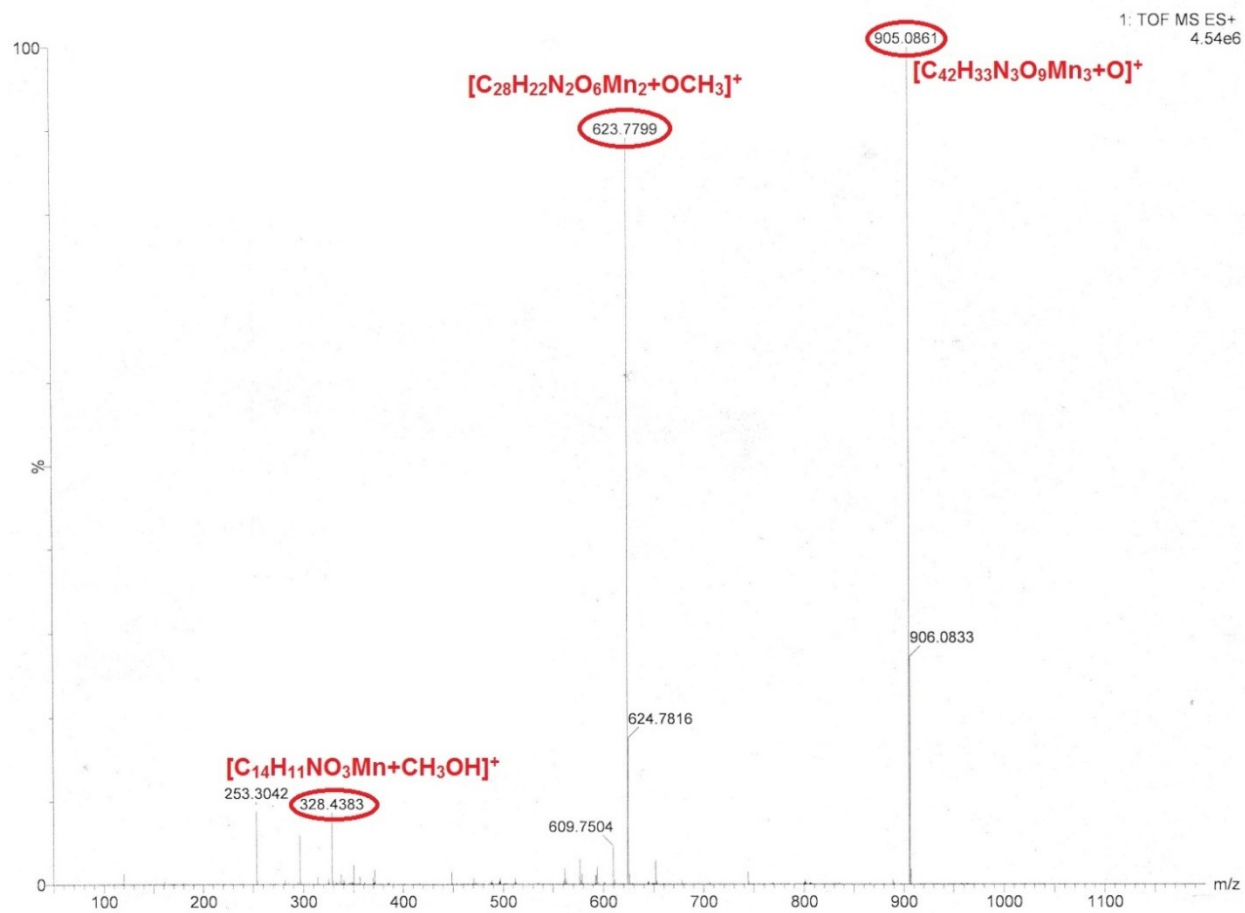

**Figure S4.** ESI-MS spectrum of complex **2** in methanol.

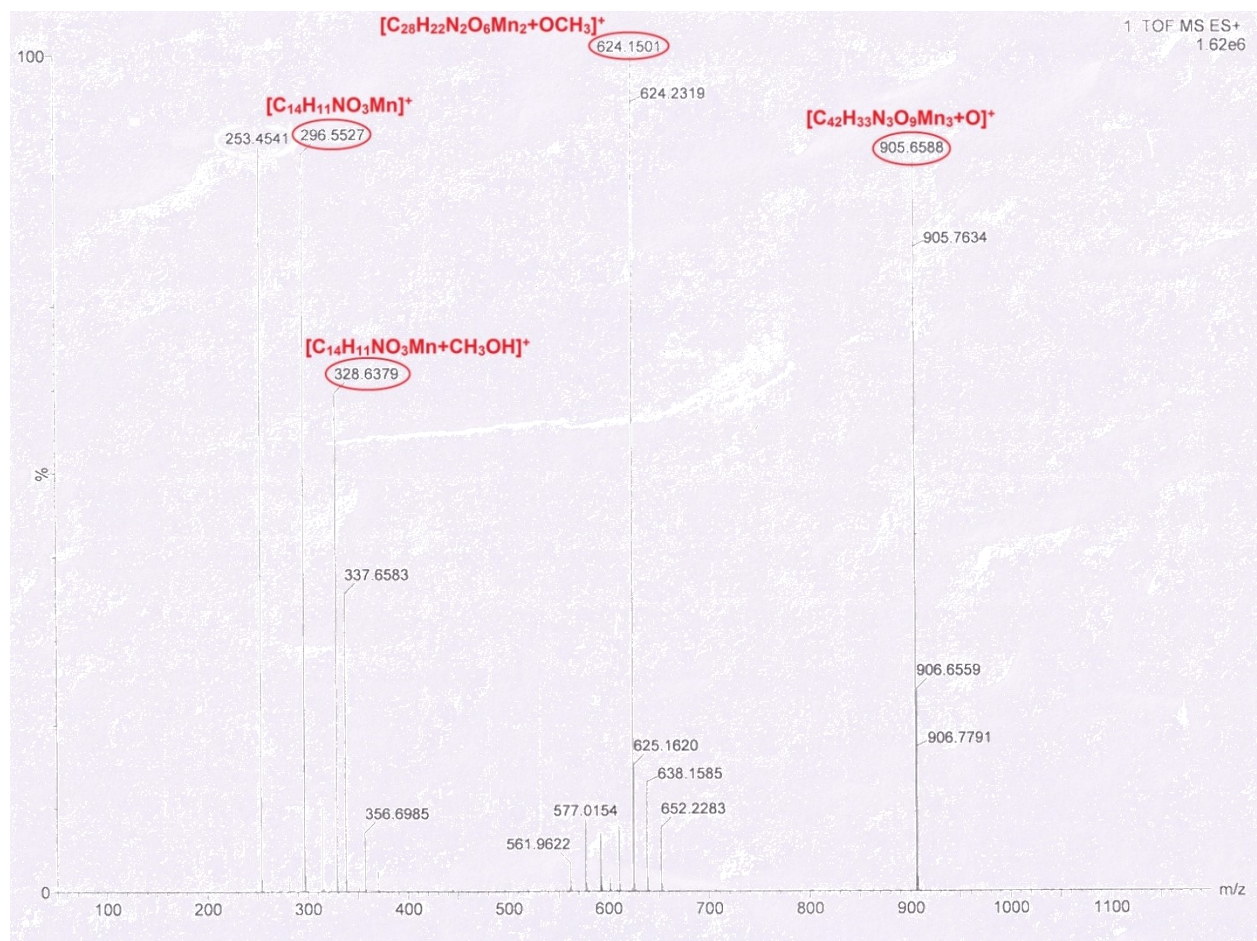

**Figure S5.** ESI-MS spectrum of complex **3** in methanol.



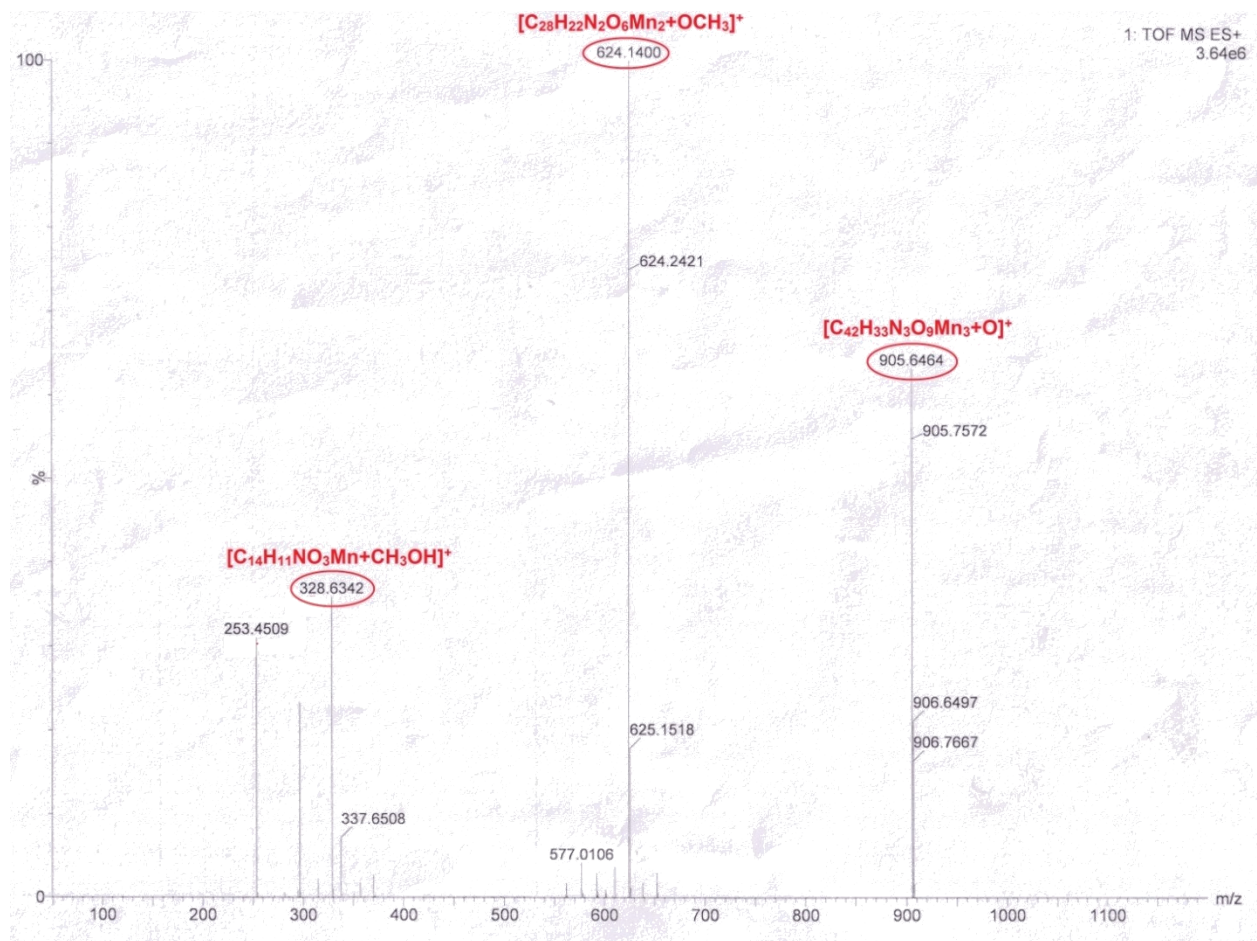

**Figure S6.** ESI-MS spectrum of complex **4** in methanol.

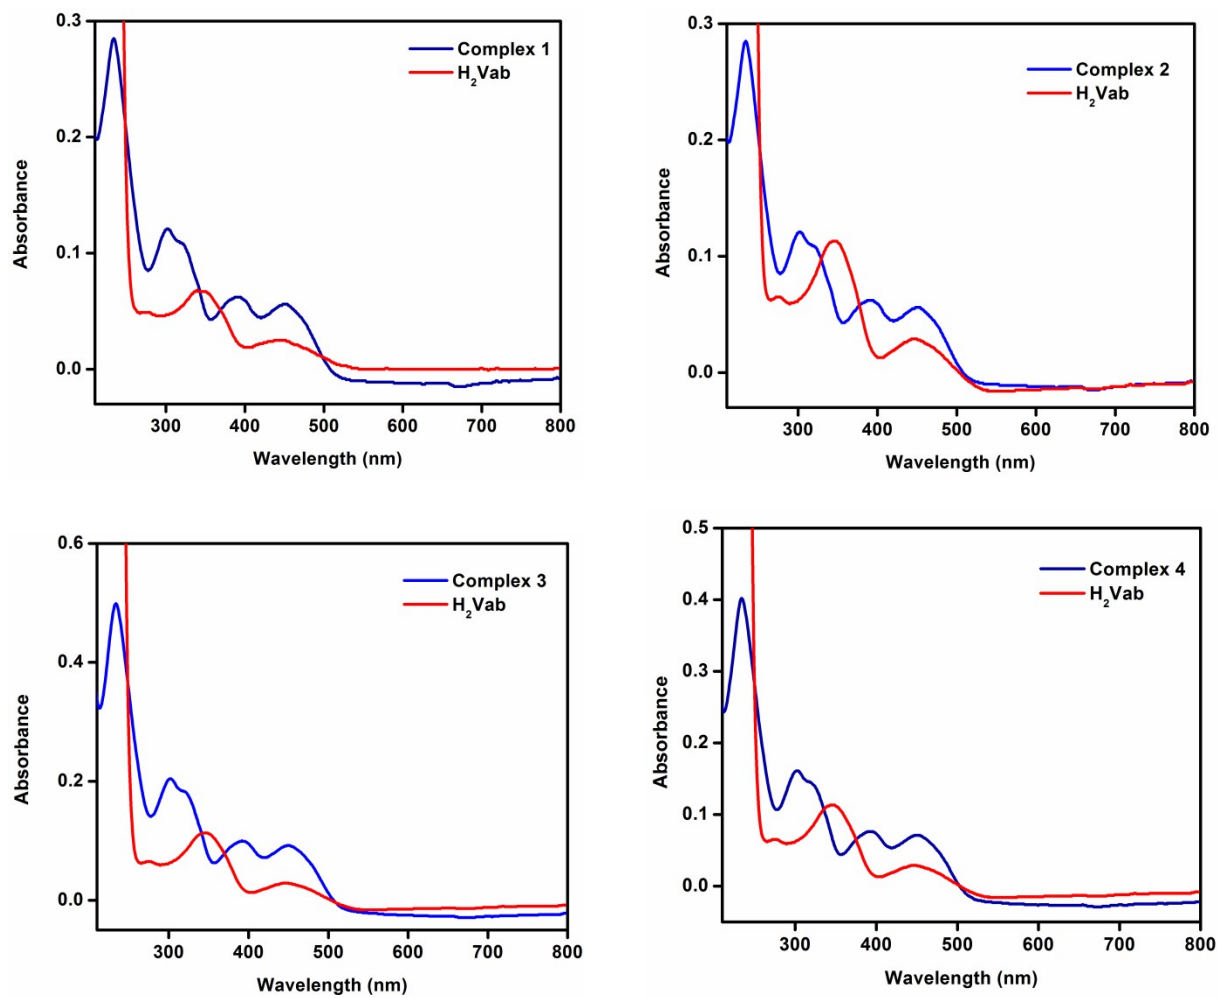

**Figure S7.** UV-Visible absorption spectra of complexes 1, 2, 3, 4 and H<sub>2</sub>Vab.

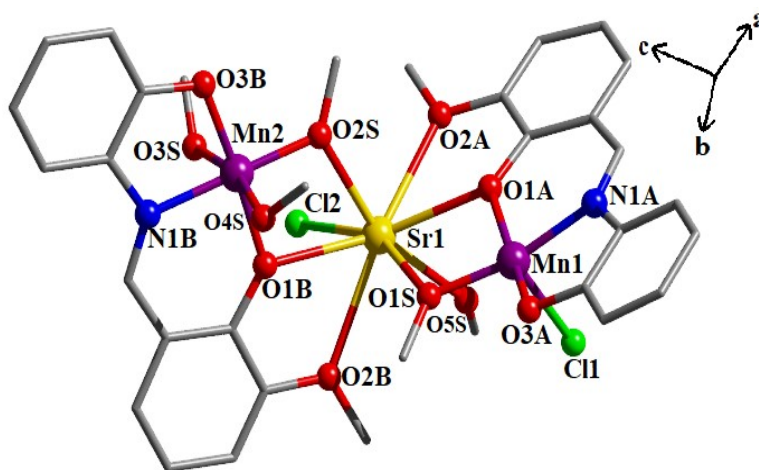

**Figure S8.** Crystal structure of complex **2** showing the trinuclear hetero-bimetallic core. Hydrogen atoms attached to carbon are removed for clarity. Color code: C = grey; N = blue; O = red; H = black; Cl = green; Mn<sup>III</sup> = purple; Sr<sup>II</sup> = gold.

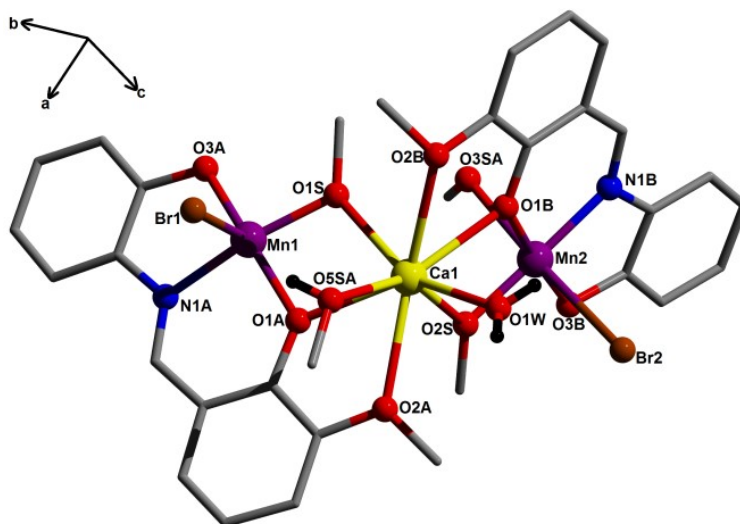

**Figure S9.** Crystal structure of complex **3** showing the trinuclear hetero-bimetallic core. Hydrogen atoms attached to carbon are removed for clarity. Color code: C = grey; N = blue; O = red; H = black; Br = brown; Mn<sup>III</sup> = purple; Ca<sup>II</sup> = yellow.

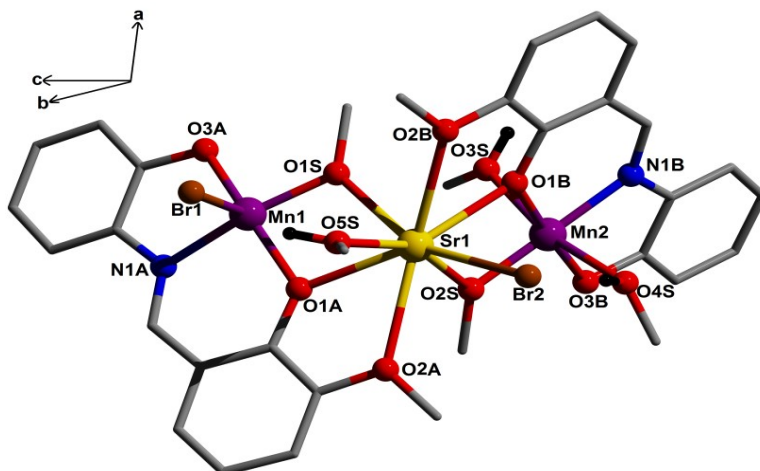

**Figure S10.** Crystal structure of complex **4** showing the trinuclear hetero-bimetallic core. Hydrogen atoms attached to carbon are removed for clarity. Color code: C = grey; N = blue; O = red; H = black; Br = brown; Mn<sup>III</sup> = purple; Sr<sup>II</sup> = gold.

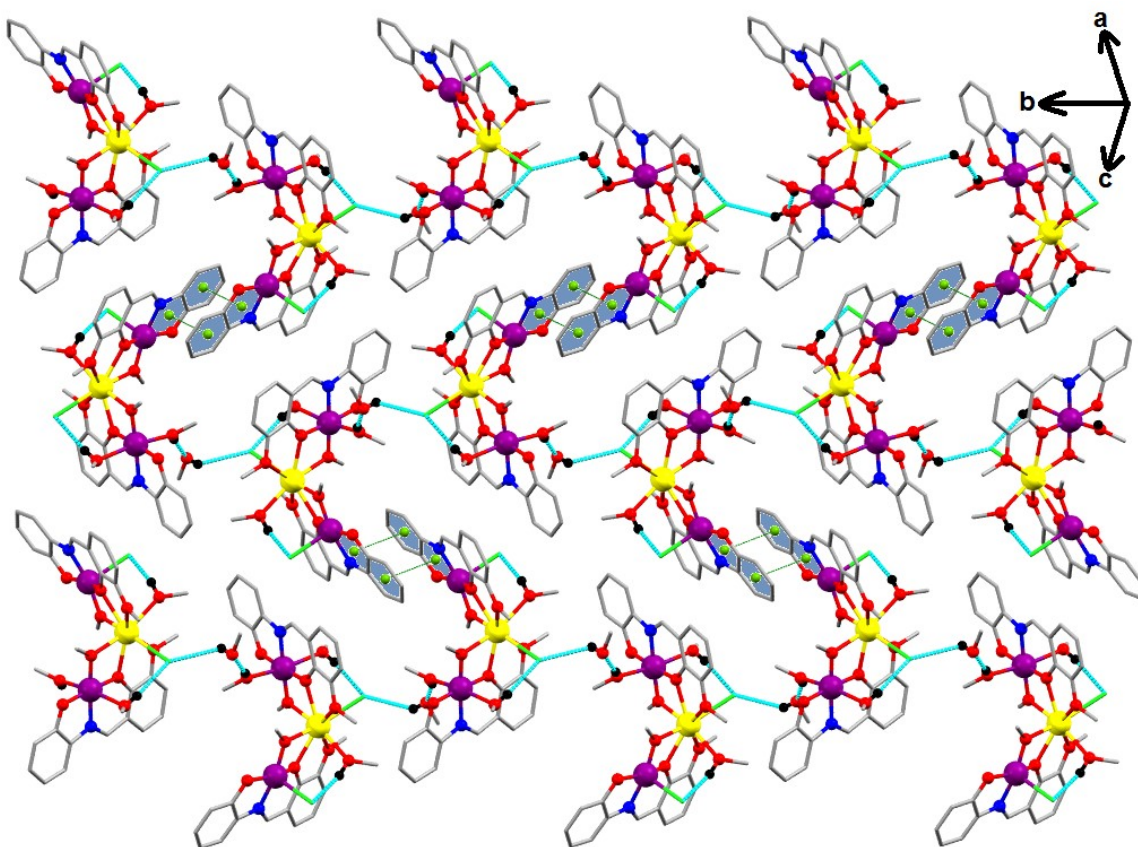

**Figure S11.** A supramolecular 2D structure of complex **1** formed by  $\pi \cdots \pi$  interactions between 1D sheets along the *b* axis which are formed by O–H $\cdots$ O bonds along the *a* axis.

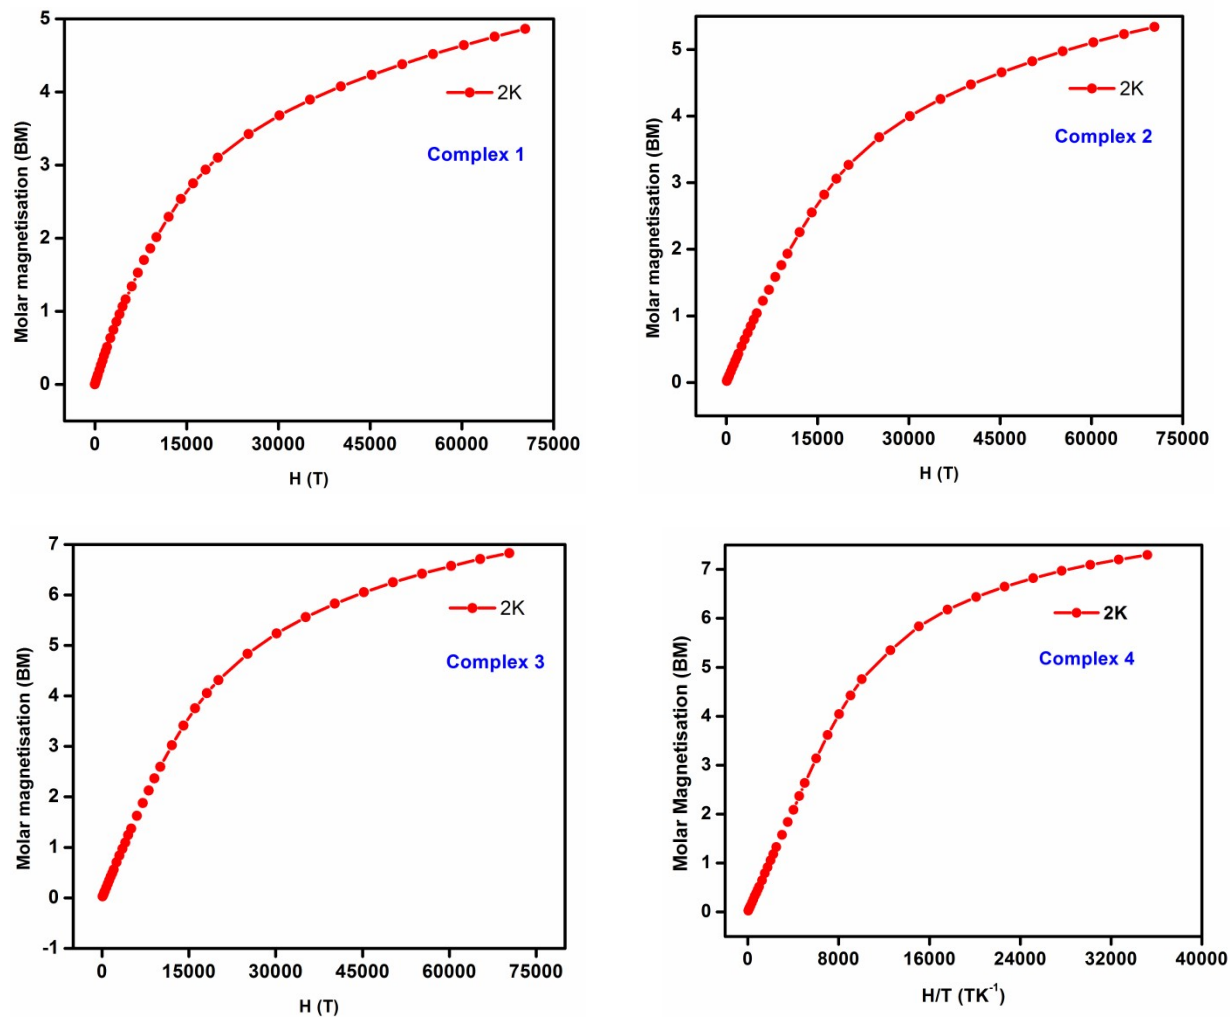

Figure S12. Molar magnetization ( $M$ ) vs. magnetic field ( $H$ ) for complexes 1-4 at 2.0 K.

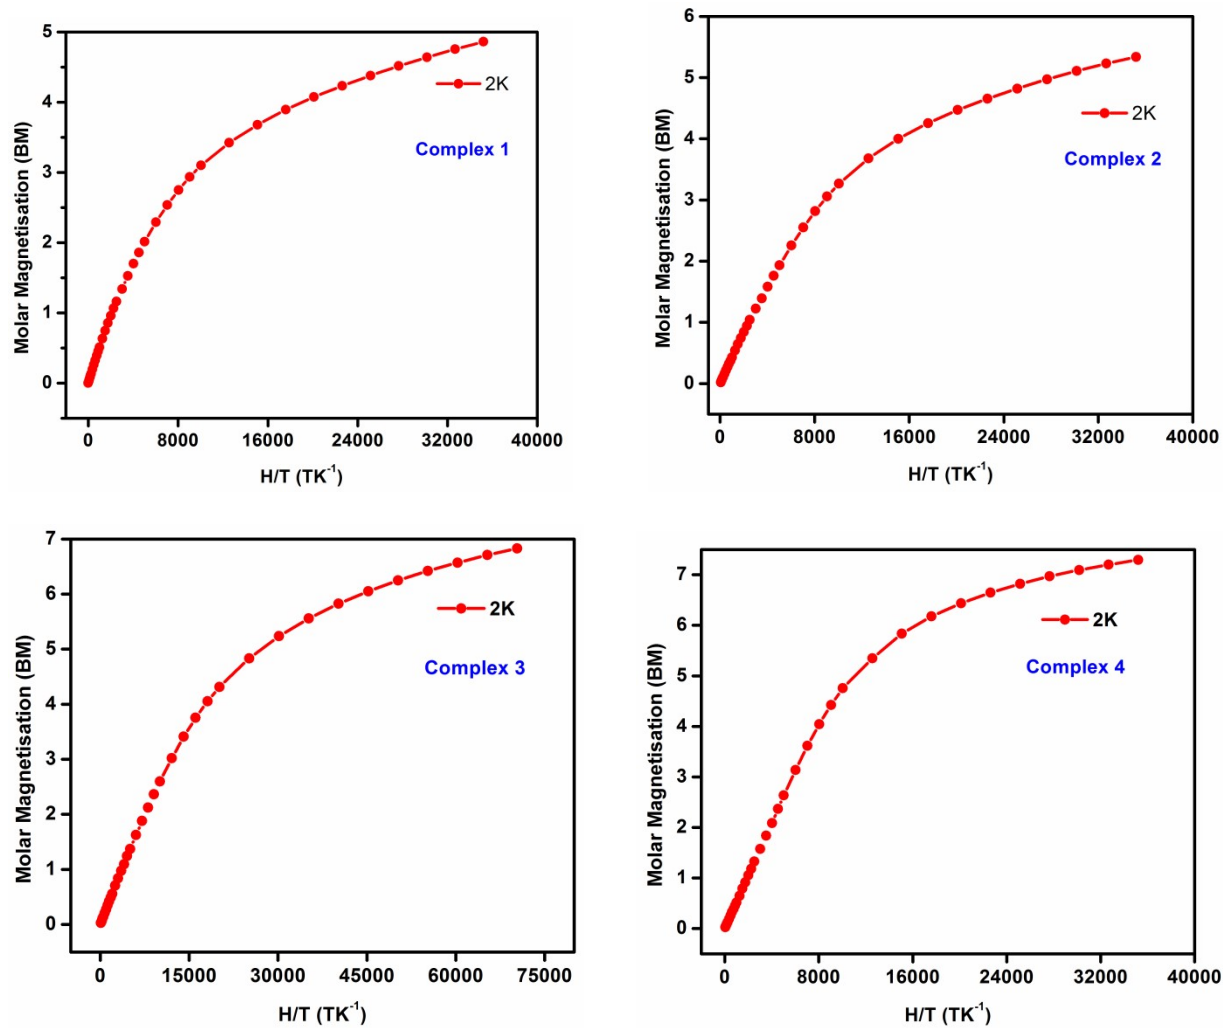

Figure S13. Molar magnetization ( $M$ ) vs.  $H/T$  plot for complexes 1-4 at 2.0 K.



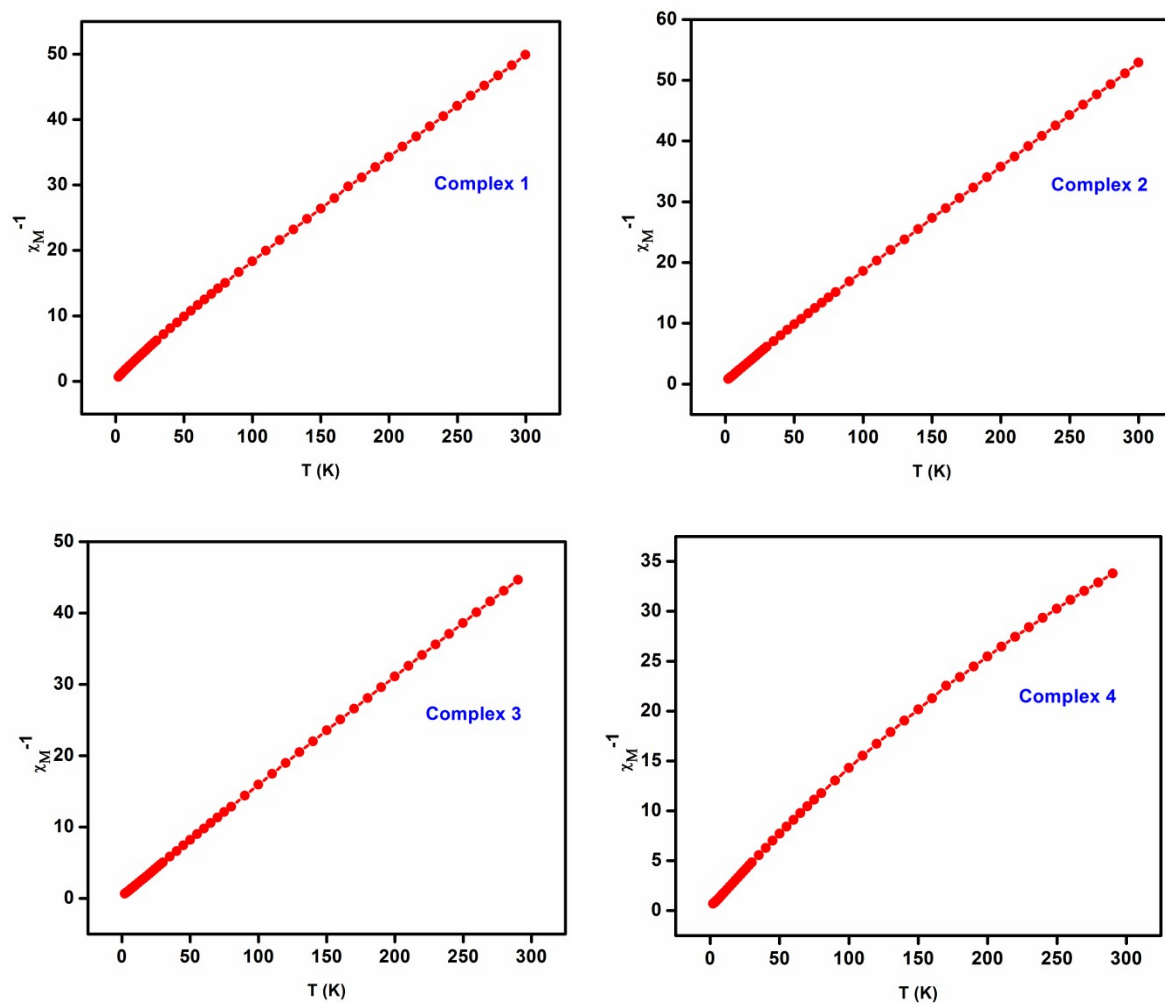

**Figure S14.** Temperature dependence of  $\chi_M^{-1}$  for complexes 1-4.

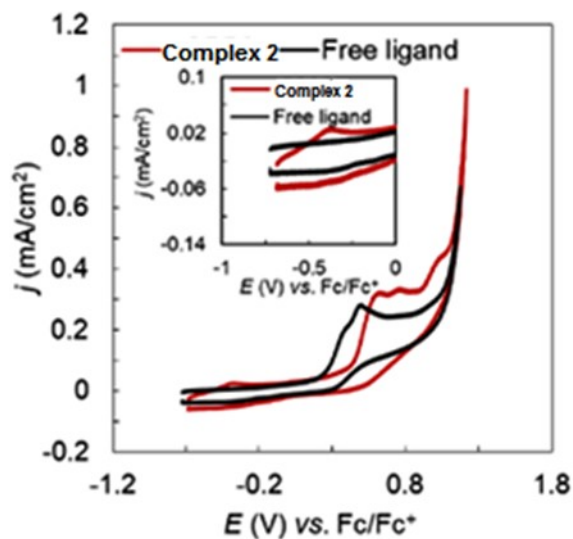

**Figure S15.** CV data for complex **2** (red) and its metal-free analog (black) in DMF. 3 mm glassy carbon as working, Ag/AgCl as a reference, Pt wire as a counter electrode.

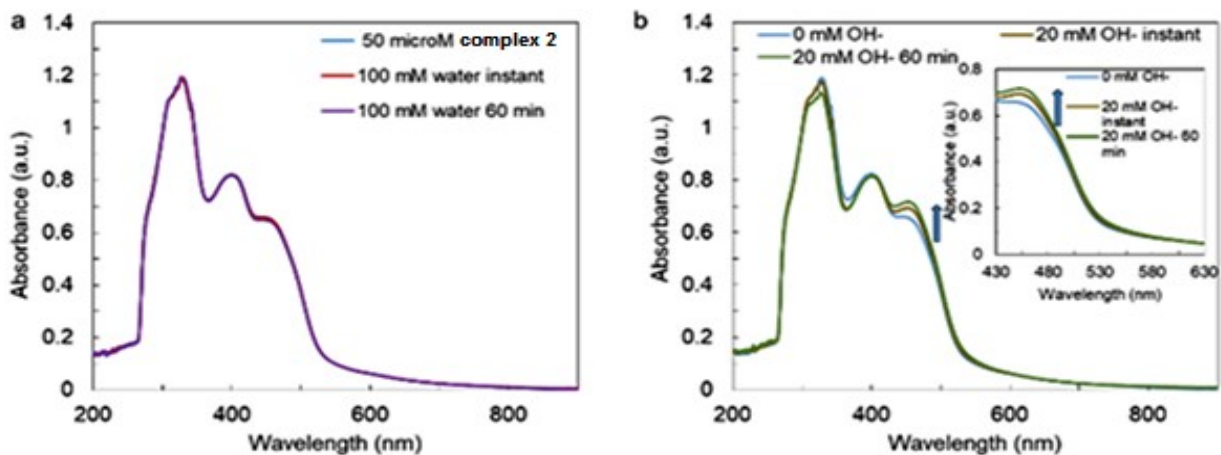

**Figure S16.** Comparative time-dependent UV-Visible spectra for complex **2**: a) after the addition of water and b) after the addition of OH<sup>-</sup>.



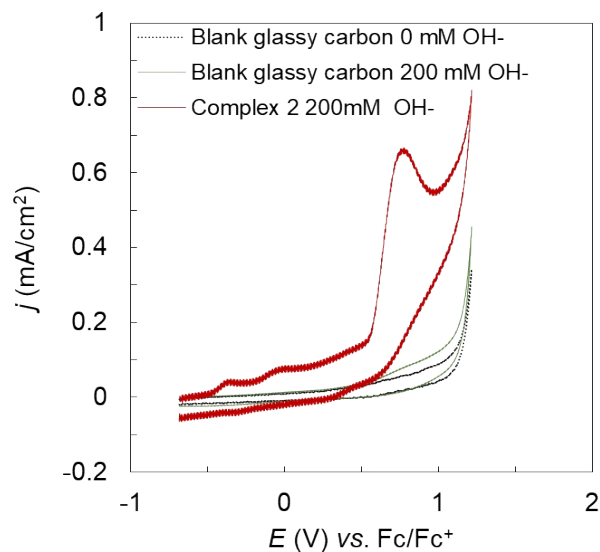

**Figure S17.** CV data for DMF with 200 mM OH<sup>-</sup> with (red) and without the catalyst (complex **2**) (green) and only DMF (black dash). 3 mm glassy carbon as working, Ag/AgCl as a reference, Pt wire as a counter electrode.

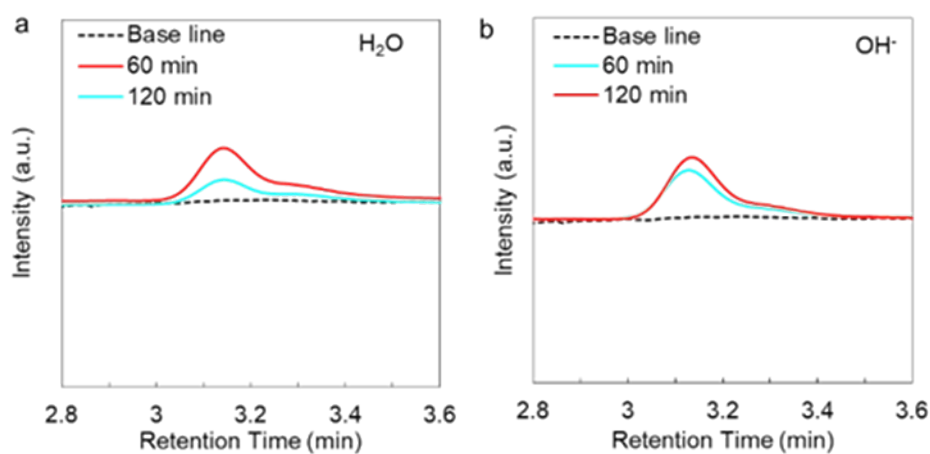

**Figure S18.** Gas chromatography (GC) Trace with complex **2**. a. Time-dependent GC trace for H<sub>2</sub>O; b. OH<sup>-</sup> oxidation. High surface area graphite rod as working, Ag/AgCl as a reference, Pt wire as a counter electrode. The controlled experiments without the manganese complex keeping all other experimental conditions unchanged (one with water and the other with hydroxide) yield no O<sub>2</sub> in GC. The current at the onset potential is very low. Hence, the electrolysis is performed

at a higher potential where the current density is large to ensure a detectable amount of O<sub>2</sub> production at a shorter time.

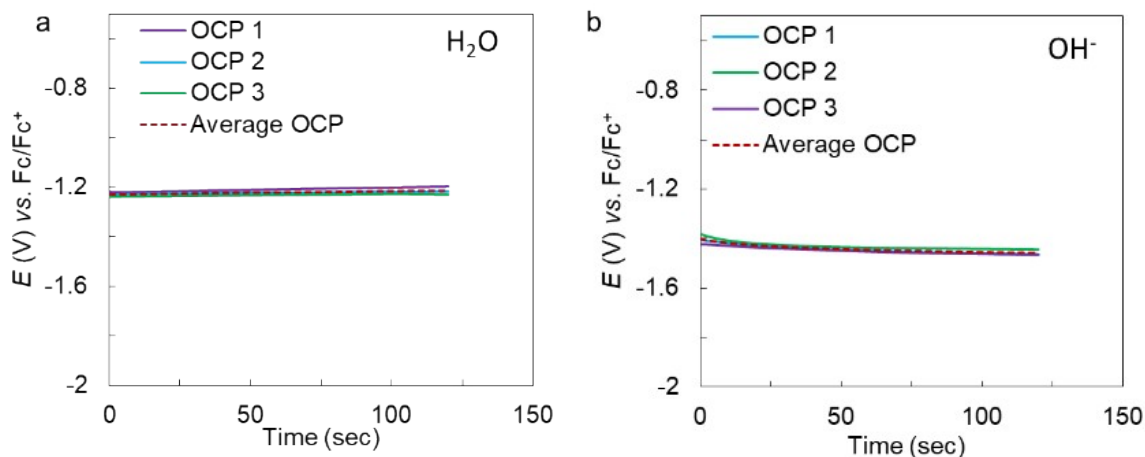

**Figure S19.** OCP measurement in DMF. a. OCP measurement with 1000 mM H<sub>2</sub>O; b. with 200 mM OH<sup>-</sup>. Pt as working, Ag/AgCl as a reference, Pt wire as a counter electrode. The reference is corrected with respect to the Fc<sup>+0</sup>.

**Figure S20.** a. Comparative CV for complex 2, free ligand and blank carbon cloth in 1M KOH. b. Time-dependent GC trace for OH<sup>-</sup> oxidation; c. Comparative CV for complex 2, free ligand, and blank carbon cloth in pH 7 buffer. The potential (1.75 V vs. RHE) at which electrolysis is performed is marked as an asterisk and the %FY is 77%.

1\*1 cm<sup>2</sup> carbon cloth as working, Ag/AgCl as a reference, and Pt wire as a counter electrode. The catalyst ink is prepared in IPA with Nafion as a binder and in the presence of carbon black.

**Table S1.** Crystal refinement parameters of complexes 1-4.

|                  | 1                                                                                                   | 2                                                                                                   | 3                                                                                                                               | 4                                                                                                   |
|------------------|-----------------------------------------------------------------------------------------------------|-----------------------------------------------------------------------------------------------------|---------------------------------------------------------------------------------------------------------------------------------|-----------------------------------------------------------------------------------------------------|
| CCDC             | 2269162                                                                                             | 2269163                                                                                             | 2269164                                                                                                                         | 2269165                                                                                             |
| Chemical formula | C <sub>35</sub> H <sub>48</sub> CaCl <sub>2</sub><br>Mn <sub>2</sub> N <sub>2</sub> O <sub>13</sub> | C <sub>33</sub> H <sub>40</sub> SrCl <sub>2</sub><br>Mn <sub>2</sub> N <sub>2</sub> O <sub>11</sub> | C <sub>131.29</sub> H <sub>171.18</sub> Br <sub>8.70</sub><br>Ca <sub>4</sub> Mn <sub>8</sub> N <sub>8</sub> O <sub>50.30</sub> | C <sub>33</sub> H <sub>40</sub> SrBr <sub>2</sub><br>Mn <sub>2</sub> N <sub>2</sub> O <sub>11</sub> |

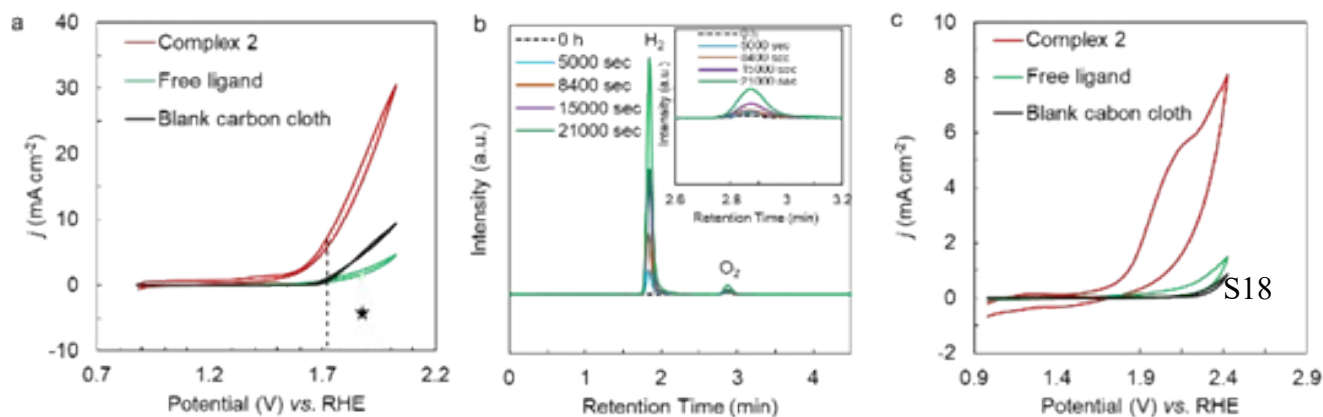

|                                                                                                                                                                                                        |                                            |                                            |                                            |                                            |
|--------------------------------------------------------------------------------------------------------------------------------------------------------------------------------------------------------|--------------------------------------------|--------------------------------------------|--------------------------------------------|--------------------------------------------|
| Formula weight                                                                                                                                                                                         | 925.61                                     | 909.07                                     | 3961.65                                    | 997.99                                     |
| Crystal color, habit                                                                                                                                                                                   | brown,<br>rectangular                      | brown,<br>rectangular                      | brown,<br>rectangular                      | brown,<br>rectangular                      |
| Temperature (K)                                                                                                                                                                                        | 296                                        | 296                                        | 100                                        | 100                                        |
| $\lambda^a$ / Å                                                                                                                                                                                        | 0.71073                                    | 0.71073                                    | 0.71073                                    | 0.71073                                    |
| Crystal system                                                                                                                                                                                         | Monoclinic                                 | Monoclinic                                 | Monoclinic                                 | Monoclinic                                 |
| Space group                                                                                                                                                                                            | P2 <sub>1</sub> /n                         | P2 <sub>1</sub> /n                         | P2 <sub>1</sub> /n                         | P2 <sub>1</sub> /n                         |
| Unit cell dimensions                                                                                                                                                                                   |                                            |                                            |                                            |                                            |
| a(Å)                                                                                                                                                                                                   | 14.317(1)                                  | 14.345(3)                                  | 14.2052(13)                                | 14.2078(9)                                 |
| b(Å)                                                                                                                                                                                                   | 18.4788(14)                                | 18.298(4)                                  | 17.5541(15)                                | 18.1152(13)                                |
| c(Å)                                                                                                                                                                                                   | 16.6261(12)                                | 16.876(3)                                  | 16.6179(16)                                | 16.8416(11)                                |
| $\alpha$ (deg)                                                                                                                                                                                         | 90                                         | 90                                         | 90                                         | 90                                         |
| $\beta$ (deg)                                                                                                                                                                                          | 104.813(3)                                 | 105.234(2)                                 | 103.820(3)                                 | 104.470(3)                                 |
| $\gamma$ (deg)                                                                                                                                                                                         | 90                                         | 90                                         | 90                                         | 90                                         |
| Volume(Å <sup>3</sup> ), Z                                                                                                                                                                             | 4252.4(5), 4                               | 4274.0(15), 4                              | 4023.9(6), 1                               | 4197.1(5), 4                               |
| Density (mg m <sup>-3</sup> )                                                                                                                                                                          | 1.446                                      | 1.413                                      | 1.635                                      | 1.579                                      |
| Absolute coefficient<br>(mm <sup>-1</sup> )                                                                                                                                                            | 0.901                                      | 2.003                                      | 2.977                                      | 3.816                                      |
| F(000)                                                                                                                                                                                                 | 1920.0                                     | 1848.0                                     | 2002.0                                     | 1992.0                                     |
| $\theta$ range (deg)                                                                                                                                                                                   | 1.678–25.396                               | 1.662–25.143                               | 2.056–26.372                               | 2.023–30.508                               |
| Crystal size (mm)                                                                                                                                                                                      | 0.36×0.30×0.24                             | 0.24×0.18×0.13                             | 0.23×0.18×0.07                             | 0.24×0.22×0.20                             |
| Limiting indices                                                                                                                                                                                       | -17≤h≤16<br>-22≤k≤21<br>-19≤l≤19           | -16≤h≤16<br>-21≤k≤20<br>-19≤l≤20           | -17≤h≤17<br>-21≤k≤21<br>-20≤l≤20           | -20≤h≤20<br>-25≤k≤21<br>-24≤l≤24           |
| Reflections collected                                                                                                                                                                                  | 55054                                      | 27418                                      | 86305                                      | 70748                                      |
| Unique reflections (R <sub>int</sub> )                                                                                                                                                                 | 7753                                       | 7434                                       | 8205                                       | 12780                                      |
| Reflections with<br>I>2 $\sigma$ (I)                                                                                                                                                                   | 6568<br>99.9 %                             | 5158<br>97.3 %                             | 6061<br>99.7 %                             | 8712<br>99.7 %                             |
| Completeness to $\theta$                                                                                                                                                                               | 25.242                                     | 25.143                                     | 25.242                                     | 25.242                                     |
| Data/Resistant/Parameters                                                                                                                                                                              | 7753 / 46 / 523                            | 7434 / 33 / 487                            | 8205 / 87 / 544                            | 12780 / 9 / 476                            |
| GOOF on F2                                                                                                                                                                                             | 1.068                                      | 1.149                                      | 1.101                                      | 1.022                                      |
| Final R indices<br>[I>2 $\sigma$ (I)]                                                                                                                                                                  | 0.0474 <sup>b</sup><br>0.1422 <sup>c</sup> | 0.0404 <sup>b</sup><br>0.1072 <sup>c</sup> | 0.0872 <sup>b</sup><br>0.2339 <sup>c</sup> | 0.0407 <sup>b</sup><br>0.0985 <sup>c</sup> |
| R indices (all data)                                                                                                                                                                                   | 0.0567 <sup>b</sup><br>0.1526 <sup>c</sup> | 0.0853 <sup>b</sup><br>0.1420 <sup>c</sup> | 0.1166 <sup>b</sup><br>0.2610 <sup>c</sup> | 0.0835 <sup>b</sup><br>0.1178 <sup>c</sup> |
| Max/Min residual peaks<br>(e Å <sup>-3</sup> )                                                                                                                                                         | 0.950/-0.485                               | 0.890/-1.224                               | 2.178/-2.188                               | 1.042/-1.515                               |
| <sup>a</sup> Graphitemonochromator, <sup>b</sup> R <sub>1</sub> = $\Sigma( F_o  -  F_c )/\Sigma F_o $ , <sup>c</sup> wR <sub>2</sub> = $\{\Sigma[w( F_o ^2 -  F_c ^2)^2]/\Sigma[w( F_o ^2)^2]\}^{1/2}$ |                                            |                                            |                                            |                                            |

**Table S2.** Selected bond lengths (Å) and bond angles (°) in complex **1**.

---

**Bond lengths**

---

|         |            |         |            |
|---------|------------|---------|------------|
| Mn1–O1A | 1.900(2)   | Mn2–N1B | 2.000(3)   |
| Mn1–O3A | 1.880(2)   | Ca1–O1B | 2.462(2)   |
| Mn1–O1S | 1.849(2)   | Ca1–O2A | 2.651(2)   |
| Mn1–N1A | 1.994(3)   | Ca1–O1B | 2.429(2)   |
| Mn1–Cl1 | 2.4803(12) | Ca1–O2B | 2.666(2)   |
| Mn2–O1B | 1.900(2)   | Ca1–O1S | 2.384(2)   |
| Mn2–O3B | 1.882(2)   | Ca1–O2S | 2.373(2)   |
| Mn2–O2S | 1.863(2)   | Ca1–O5S | 2.389(3)   |
| Mn2–O3S | 2.324(3)   | Ca1–Cl2 | 2.8082(12) |
| Mn2–O4S | 2.264(3)   |         |            |

---

**Bond angles**

---

|             |            |             |           |
|-------------|------------|-------------|-----------|
| O1S-Mn1-O3A | 96.52(10)  | O1S-Ca1-O5S | 90.85(10) |
| O1S-Mn1-O1A | 84.30(9)   | O2S-Ca1-O1B | 64.46(8)  |
| O3A-Mn1-O1A | 162.09(11) | O1S-Ca1-O1B | 86.34(8)  |
| O1S-Mn1-N1A | 166.36(11) | O5S-Ca1-O1B | 137.74(9) |
| O3A-Mn1-N1A | 83.39(11)  | O2S-Ca1-O1A | 87.85(8)  |
| O1A-Mn1-N1A | 91.64(10)  | O1S-Ca1-O1A | 62.53(7)  |
| O1S-Mn1-Cl1 | 100.68(9)  | O5S-Ca1-O1A | 76.19(9)  |
| O3A-Mn1-Cl1 | 101.75(9)  | O1B-Ca1-O1A | 136.36(8) |
| O1A-Mn1-Cl1 | 95.65(8)   | O2S-Ca1-O2A | 79.63(8)  |
| N1A-Mn1-Cl1 | 92.66(8)   | O1S-Ca1-O2A | 123.08(8) |
| O2S-Mn2-O3B | 97.86(10)  | O5S-Ca1-O2A | 78.57(10) |
| O2S-Mn2-O1B | 85.78(10)  | O1B-Ca1-O2A | 136.26(8) |
| O3B-Mn2-O1B | 176.36(10) | O1A-Ca1-O2A | 60.61(7)  |
| O2S-Mn2-N1B | 177.26(11) | O2S-Ca1-O2B | 124.96(8) |
| O3B-Mn2-N1B | 84.33(11)  | O1S-Ca1-O2B | 76.13(8)  |
| O1B-Mn2-N1B | 92.03(10)  | O5S-Ca1-O2B | 77.63(9)  |
| O2S-Mn2-O4S | 97.26(14)  | O1B-Ca1-O2B | 60.75(7)  |
| O1B-Mn2-O4S | 89.00(12)  | O1A-Ca1-O2B | 129.98(8) |

|             |            |             |           |
|-------------|------------|-------------|-----------|
| N1B-Mn2-O4S | 84.34(13)  | O2A-Ca1-O2B | 149.49(8) |
| O2S-Mn2-O3S | 93.00(12)  | O2S-Ca1-Cl2 | 96.21(7)  |
| O3B-Mn2-O3S | 93.05(11)  | O1S-Ca1-Cl2 | 154.29(7) |
| O1B-Mn2-O3S | 86.50(11)  | O5S-Ca1-Cl2 | 86.52(8)  |
| N1B-Mn2-O3S | 85.22(11)  | O1B-Ca1-Cl2 | 78.65(6)  |
| O4S-Mn2-O3S | 168.47(13) | O1A-Ca1-Cl2 | 140.51(6) |
| O2S-Ca1-O1S | 95.96(10)  | O2A-Ca1-Cl2 | 81.44(6)  |
| O2S-Ca1-O5S | 157.36(10) | O2B-Ca1-Cl2 | 78.33(7)  |

---

**Table S3.** Selected bond lengths (Å) and bond angles (°) in complex **2**.

---

**Bond lengths**

---

|         |            |         |            |
|---------|------------|---------|------------|
| Mn1–O1A | 1.898(3)   | Mn2–N1B | 1.989(4)   |
| Mn1–O3A | 1.874(3)   | Sr1–O1A | 2.587(3)   |
| Mn1–O1S | 1.842(3)   | Sr1–O2A | 2.700(3)   |
| Mn1–N1A | 1.991(4)   | Sr1–O1B | 2.562(3)   |
| Mn1–Cl1 | 2.4714(14) | Sr1–O2B | 2.726(3)   |
| Mn2–O1B | 1.908(3)   | Sr1–O1S | 2.505(3)   |
| Mn2–O3B | 1.875(3)   | Sr1–O2S | 2.513(3)   |
| Mn2–O2S | 1.856(3)   | Sr1–O5S | 2.543(3)   |
| Mn2–O3S | 2.313(3)   | Sr1–Cl2 | 2.9216(14) |
| Mn2–O4S | 2.243(4)   |         |            |

---

---

**Bond angles**

---

|             |            |             |            |
|-------------|------------|-------------|------------|
| O1S-Mn1-O3A | 96.03(14)  | O2S-Sr1-O5S | 160.47(13) |
| O1S-Mn1-O1A | 85.37(13)  | O1S-Sr1-O1B | 88.62(10)  |
| O3A-Mn1-O1A | 162.66(14) | O2S-Sr1-O1B | 61.78(10)  |
| O1S-Mn1-N1A | 165.98(14) | O5S-Sr1-O1B | 137.66(12) |
| O3A-Mn1-N1A | 83.25(15)  | O1S-Sr1-O1A | 59.70(10)  |
| O1A-Mn1-N1A | 91.22(14)  | O2S-Sr1-O1A | 89.75(9)   |
| O1S-Mn1-Cl1 | 100.27(11) | O5S-Sr1-O1A | 75.31(10)  |
| O3A-Mn1-Cl1 | 101.27(11) | O1B-Sr1-O1A | 136.18(9)  |
| O1A-Mn1-Cl1 | 95.45(9)   | O1S-Sr1-O2A | 118.31(9)  |
| N1A-Mn1-Cl1 | 93.59(10)  | O2S-Sr1-O2A | 81.40(10)  |
| O2S-Mn2-O3B | 96.41(14)  | O5S-Sr1-O2A | 80.09(13)  |
| O2S-Mn2-O1B | 87.62(13)  | O1B-Sr1-O2A | 136.71(9)  |
| O3B-Mn2-O1B | 175.76(14) | O1A-Sr1-O2A | 58.72(9)   |
| O2S-Mn2-N1B | 178.30(15) | O1S-Sr1-O2B | 77.01(10)  |
| O3B-Mn2-N1B | 84.17(15)  | O2S-Sr1-O2B | 119.91(10) |
| O3B-Mn2-N1B | 91.76(14)  | O5S-Sr1-O2B | 79.60(12)  |
| O2S-Mn2-O4S | 96.47(15)  | O1B-Sr1-O2B | 58.59(9)   |

|             |            |             |            |
|-------------|------------|-------------|------------|
| O3B-Mn2-O4S | 91.49(16)  | O1A-Sr1-O2B | 129.88(10) |
| O1B-Mn2-O4S | 89.38(15)  | O2A-Sr1-O2B | 154.03(10) |
| N1B-Mn2-O4S | 85.10(15)  | O1S-Sr1-Cl2 | 157.21(8)  |
| O2S-Mn2-O3S | 92.59(15)  | O2S-Sr1-Cl2 | 95.48(8)   |
| O3B-Mn2-O3S | 92.75(14)  | O5S-Sr1-Cl2 | 88.52(8)   |
| O1B-Mn2-O3S | 85.71(13)  | O1B-Sr1-Cl2 | 78.77(7)   |
| N1B-Mn2-O3S | 85.78(15)  | O1A-Sr1-Cl2 | 140.39(8)  |
| O4S-Mn2-O3S | 169.51(15) | O2A-Sr1-Cl2 | 83.25(7)   |
| O1S-Sr1-O2S | 95.12(11)  | O2B-Sr1-Cl2 | 80.21(8)   |
| O1S-Sr1-O5S | 88.20(12)  |             |            |

---

**Table S4.** Selected bond lengths (Å) and bond angles (°) in complex **3**.

---

**Bond lengths**

---

|         |            |         |          |
|---------|------------|---------|----------|
| Mn1–O1  | 1.874(5)   | Mn2–N3  | 2.261(9) |
| Mn1–O2  | 1.886(5)   | Ca1–O1W | 2.366(7) |
| Mn1–O5  | 1.874(5)   | Ca1–O2  | 2.412(5) |
| Mn1–N1  | 2.001(6)   | Ca1–O2W | 2.401(6) |
| Mn1–Br  | 2.6604(14) | Ca1–O4  | 2.422(5) |
| Mn2–O3  | 1.878(5)   | Ca1–O5  | 2.438(5) |
| Mn2–O3W | 2.308(7)   | Ca1–O6  | 2.370(5) |
| Mn2–O4  | 1.900(5)   | Ca1–O7  | 2.550(6) |
| Mn2–O6  | 1.859(6)   | Ca1–O8  | 2.602(7) |
| Mn2–O7  | 2.261(9)   |         |          |

---

---

**Bond angles**

---

|            |            |            |            |
|------------|------------|------------|------------|
| O1–Mn1–O2  | 164.8(2)   | O1W–Ca1–O4 | 80.1(2)    |
| O1–Mn1–O5  | 96.2(2)    | O1W–Ca1–O5 | 155.0(2)   |
| O1–Mn1–N1  | 84.0(2)    | O1W–Ca1–O6 | 96.0(2)    |
| O2–Mn1–O5  | 84.2(2)    | O1W–Ca1–N2 | 80.1(2)    |
| O2–Mn1–N1  | 92.0(2)    | O1W–Ca1–N4 | 78.5(3)    |
| O5–Mn1–N1  | 166.2(2)   | O2–Ca1–O2W | 77.2(2)    |
| O1–Mn1–Br1 | 99.57(16)  | O2–Ca1–O4  | 135.96(18) |
| O2–Mn1–Br1 | 95.27(16)  | O2–Ca1–O5  | 62.60(16)  |
| O5–Mn1–Br1 | 100.71(16) | O2–Ca1–O6  | 89.08(18)  |
| N1–Mn1–Br1 | 92.85(15)  | O2–Ca1–N2  | 62.60(16)  |
| O3–Mn2–O3W | 95.0(2)    | O2–Ca1–N4  | 128.58(19) |
| O3–Mn2–O4  | 175.5(2)   | O2W–Ca1–O4 | 138.9(2)   |
| O3–Mn2–O6  | 98.7(2)    | O2W–Ca1–O5 | 98.6(2)    |
| O3–Mn2–O7  | 92.2(3)    | O2W–Ca1–O6 | 154.3(2)   |
| O3–Mn2–N3  | 84.2(2)    | O2W–Ca1–N2 | 77.1(2)    |
| O3W–Mn2–O4 | 84.9(2)    | O2W–Ca1–N4 | 78.9(2)    |
| O3W–Mn2–O4 | 86.7(3)    | O4–Ca1–O5  | 83.67(17)  |



|             |          |           |            |
|-------------|----------|-----------|------------|
| O3W-Mn2-O7  | 172.3(3) | O4-Ca1-O6 | 64.56(19)  |
| O3W-Mn2-N3  | 94.0(3)  | O4-Ca1-N2 | 134.45(17) |
| O4-Mn2-O6   | 85.8(2)  | O4-Ca1-N4 | 61.51(19)  |
| O4-Mn2-O7   | 87.8(3)  | O5-Ca1-O6 | 94.00(18)  |
| O4-Mn2-N3   | 91.3(2)  | O5-Ca1-N2 | 124.56(17) |
| O6-Mn2-O7   | 95.0(3)  | O5-Ca1-N4 | 77.05(19)  |
| O6-Mn2-N3   | 177.0(2) | O6-Ca1-N2 | 77.32(19)  |
| O7-Mn2-N3   | 83.9(3)  | O6-Ca1-N4 | 125.9(2)   |
| O1W-Ca1-O2  | 140.3(2) | N2-Ca1-N4 | 149.8(2)   |
| O1W-Ca1-O2W | 81.8(2)  |           |            |

---

**Table S5.** Selected bond lengths (Å) and bond angles (°) in complex **4**.

| <b>Bond lengths</b> |           |         |           |
|---------------------|-----------|---------|-----------|
| Mn1-O4              | 1.850(2)  | Mn2-N2  | 2.006(3)  |
| Mn1-O1              | 1.876(2)  | Sr1-O9  | 2.501(2)  |
| Mn1-O2              | 1.904(2)  | Sr1-O4  | 2.505(2)  |
| Mn1-N1              | 1.998(3)  | Sr1-O7  | 2.543(2)  |
| Mn1-N1              | 2.6749(6) | Sr1-O5  | 2.554(2)  |
| Mn2-O9              | 1.875(2)  | Sr1-O2  | 2.571(2)  |
| Mn2-O6              | 1.885(2)  | Sr1-O3  | 2.688(2)  |
| Mn2-O7              | 1.909(2)  | Sr1-O8  | 2.692(2)  |
| Mn2-O10             | 2.231(3)  | Sr1-Br2 | 3.1324(5) |
| Mn2-O11             | 2.307(3)  |         |           |

  

| <b>Bond angles</b> |            |           |           |
|--------------------|------------|-----------|-----------|
| O4-Mn1-O1          | 96.21(10)  | O4-Sr1-O7 | 88.03(7)  |
| O4-Mn1-O2          | 85.65(10)  | O9-Sr1-O5 | 159.44(8) |
| O1-Mn1-O2          | 166.97(10) | O4-Sr1-O5 | 94.82(8)  |
| O4-Mn1-N1          | 166.41(11) | O7-Sr1-O5 | 135.81(8) |
| O1-Mn1-N1          | 83.73(10)  | O9-Sr1-O2 | 92.29(8)  |
| O2-Mn1-N1          | 91.45(10)  | O4-Sr1-O2 | 60.35(7)  |
| O4-Mn1-Br1         | 98.58(8)   | O7-Sr1-O2 | 138.06(7) |
| O1-Mn1-Br1         | 98.71(7)   | O5-Sr1-O2 | 77.80(8)  |
| O2-Mn1-Br1         | 93.74(7)   | O9-Sr1-O3 | 80.45(8)  |
| N1-Mn1-Br1         | 94.85(8)   | O4-Sr1-O3 | 119.11(7) |
| O9-Mn2-O6          | 97.04(10)  | O7-Sr1-O3 | 136.39(7) |
| O9-Mn2-O7          | 87.07(10)  | O5-Sr1-O3 | 79.00(8)  |
| O6-Mn2-O7          | 175.87(10) | O2-Sr1-O3 | 59.15(7)  |
| O9-Mn2-N2          | 177.29(12) | O9-Sr1-O8 | 120.91(7) |
| O6-Mn2-N2          | 84.31(11)  | O4-Sr1-O8 | 74.78(7)  |
| O7-Mn2-N2          | 91.56(10)  | O7-Sr1-O8 | 59.31(7)  |

|             |            |            |           |
|-------------|------------|------------|-----------|
| O9-Mn2-O10  | 95.36(11)  | O5-Sr1-O8  | 78.93(8)  |
| O6-Mn2-O10  | 92.80(10)  | O2-Sr1-O8  | 126.69(7) |
| O7-Mn2-O10  | 87.18(10)  | O3-Sr1-O8  | 154.82(7) |
| N2-Mn2-O10  | 86.91(11)  | O9-Sr1-Br2 | 93.19(6)  |
| O9-Mn2-O11  | 92.29(10)  | O4-Sr1-Br2 | 156.22(5) |
| O6-Mn2-O11  | 93.30(10)  | O7-Sr1-Br2 | 76.79(5)  |
| O7-Mn2-O11  | 86.12(9)   | O5-Sr1-Br2 | 83.97(6)  |
| N2-Mn2-O11  | 85.28(10)  | O2-Sr1-Br2 | 141.25(5) |
| O10-Mn2-O11 | 169.56(10) | O3-Sr1-Br2 | 84.07(5)  |
| O9-Sr1-O4   | 95.79(8)   | O8-Sr1-Br2 | 81.70(5)  |
| O9-Sr1-O7   | 62.22(7)   |            |           |

---

**Table S6.** Bond Valence Sum (BVS) results for manganese centers in complex **1** in different oxidation states and their assignment.

|            | <b>Mn<sup>II</sup></b> | <b>Mn<sup>III</sup></b> | <b>Assignment</b>       |
|------------|------------------------|-------------------------|-------------------------|
| <b>Mn1</b> | 3.271                  | <b>3.084</b>            | <b>Mn<sup>III</sup></b> |
| <b>Mn2</b> | 3.314                  | <b>3.082</b>            | <b>Mn<sup>III</sup></b> |

**Table S7.** Bond Valence Sum (BVS) results for manganese centers in complex **2** in different oxidation states and their assignment.

|            | <b>Mn<sup>II</sup></b> | <b>Mn<sup>III</sup></b> | <b>Assignment</b>       |
|------------|------------------------|-------------------------|-------------------------|
| <b>Mn1</b> | 3.387                  | <b>3.149</b>            | <b>Mn<sup>III</sup></b> |
| <b>Mn2</b> | 3.315                  | <b>3.125</b>            | <b>Mn<sup>III</sup></b> |

**Table S8.** Bond Valence Sum (BVS) results for manganese centers in complex **3** in different oxidation states and their assignment.

|            | <b>Mn<sup>II</sup></b> | <b>Mn<sup>III</sup></b> | <b>Assignment</b>       |
|------------|------------------------|-------------------------|-------------------------|
| <b>Mn1</b> | 3.114                  | <b>2.969</b>            | <b>Mn<sup>III</sup></b> |
| <b>Mn2</b> | 3.504                  | <b>3.321</b>            | <b>Mn<sup>III</sup></b> |

**Table S9.** Bond Valence Sum (BVS) results for manganese centers in complex **4** in different oxidation states and their assignment.

|            | <b>Mn<sup>II</sup></b> | <b>Mn<sup>III</sup></b> | <b>Assignment</b>       |
|------------|------------------------|-------------------------|-------------------------|
| <b>Mn1</b> | 3.139                  | <b>2.997</b>            | <b>Mn<sup>III</sup></b> |
| <b>Mn2</b> | 3.464                  | <b>3.288</b>            | <b>Mn<sup>III</sup></b> |

**Table S10.** Continuous Shape Measures (CShMs) of manganese centers in complexes **1**, **2**, **3** and **4** respectively relative to ideal 5/6-vertex polyhedral. The lowest CShMs value which corresponds to closest geometry is highlighted.

| 5-vertex polyhedral |              |              |              |              |          |                                 |
|---------------------|--------------|--------------|--------------|--------------|----------|---------------------------------|
| Mn1                 |              |              |              |              |          |                                 |
|                     | Complex1     | Complex2     | Complex3     | Complex4     | Symmetry | Ideal shape                     |
| PP-5                | 31.349       | 29.510       | 32.128       | 32.981       | D5h      | Pentagon                        |
| vOC-5               | 2.669        | 2.291        | 3.408        | 3.298        | D5h      | Vacant octahedron               |
| TBPY-5              | 5.298        | 6.516        | 6.040        | 6.231        | D3h      | Trigonalbipyramid               |
| SPY-5               | <b>0.870</b> | <b>1.529</b> | <b>1.264</b> | <b>1.238</b> | C4v      | <b>Spherical square pyramid</b> |
| JTBPY-5             | 8.808        | 7.473        | 9.737        | 10.210       | D3h      | Johnson trigonalbipyramid J12   |

| 6-vertex polyhedral |              |              |              |              |          |                               |
|---------------------|--------------|--------------|--------------|--------------|----------|-------------------------------|
| Mn2                 |              |              |              |              |          |                               |
|                     | Complex1     | Complex2     | Complex3     | Complex4     | Symmetry | Ideal shape                   |
| HP-6                | 31.933       | 28.041       | 30.680       | 31.993       | D6h      | Hexagon                       |
| PPY-6               | 27.384       | 27.172       | 27.826       | 27.936       | C5v      | Pentagonal pyramid            |
| OC-6                | <b>1.091</b> | <b>2.884</b> | <b>1.091</b> | <b>0.888</b> | Oh       | <b>Octahedron</b>             |
| TPR-6               | 14.890       | 14.982       | 15.986       | 15.018       | D3h      | Trigonal prism                |
| JPPY-6              | 30.347       | 29.841       | 30.522       | 30.981       | C5v      | Johnson pentagonal pyramid J2 |

**Table S11.** Continuous Shape Measures (CShMs) of calcium and strontium centers in complexes **1**, **3** and **2**, **4** respectively relative to ideal 8-vertex polyhedral. The lowest CShMs value which corresponds to closest geometry is highlighted.

| 8-vertex polyhedral |  |  |  |  |  |  |
|---------------------|--|--|--|--|--|--|
| Ca1                 |  |  |  |  |  |  |

|          | <b>Complex1</b> | <b>Complex3</b> | <b>Symmetry</b> | <b>Ideal shape</b>                         |
|----------|-----------------|-----------------|-----------------|--------------------------------------------|
| OP-8     | 31.782          | 31.367          | D8h             | Octagon                                    |
| HPY-8    | 24.413          | 23.402          | C7v             | Heptagonal pyramid                         |
| HBPY-8   | 13.019          | 12.854          | D6h             | Hexagonal bipyramid                        |
| CU-8     | 10.810          | 10.103          | Oh              | Cube                                       |
| SAPR-8   | 4.566           | 3.622           | D4d             | Square antiprism                           |
| TDD-8    | <b>3.030</b>    | <b>2.742</b>    | D2d             | <b>Triangular dodecahedron</b>             |
| JGBF-8   | 11.268          | 10.788          | D2d             | Johnson gyrobifastigium J26                |
| JETBPY-8 | 26.374          | 25.043          | D3h             | Johnson elongated triangular bipyramid J14 |
| JBTPR-8  | 3.868           | 3.363           | C2v             | Biaugmentedtrigonal prism J50              |
| BTPR-8   | 3.428           | 2.970           | C2v             | Biaugmentedtrigonal prism                  |
| JSD-8    | 3.745           | 3.322           | D2d             | Snub diphenoid J84                         |
| TT-8     | 11.180          | 10.933          | TT-8            | Triakis tetrahedron                        |
| ETBPY-8  | 22.864          | 22.451          | D3h             | Elongated trigonalbipyramid                |

---

**8-vertex polyhedral**

---

**Sr1**

---

|        | <b>Complex2</b> | <b>Complex4</b> | <b>Symmetry</b> | <b>Ideal shape</b>  |
|--------|-----------------|-----------------|-----------------|---------------------|
| OP-8   | 26.281          | 32.759          | D8h             | Octagon             |
| HPY-8  | 21.210          | 23.126          | C7v             | Heptagonal pyramid  |
| HBPY-8 | 12.474          | 12.149          | D6h             | Hexagonal bipyramid |

|          |              |              |      |                                               |
|----------|--------------|--------------|------|-----------------------------------------------|
| CU-8     | 11.733       | 9.709        | Oh   | Cube                                          |
| SAPR-8   | 7.905        | 5.214        | D4d  | Square antiprism                              |
| TDD-8    | 5.636        | <b>4.264</b> | D2d  | <b>Triangular dodecahedron</b>                |
| JGBF-8   | 11.562       | 12.139       | D2d  | Johnson gyrobifastigium J26                   |
| JETBPY-8 | 17.623       | 25.848       | D3h  | Johnson elongated triangular bipyramid<br>J14 |
| JBTPR-8  | <b>4.568</b> | 5.294        | C2v  | <b>Biaugmentedtrigonal prism J50</b>          |
| BTPR-8   | 5.875        | 4.642        | C2v  | Biaugmentedtrigonal prism                     |
| JSD-8    | 4.892        | 5.452        | D2d  | Snub diphennoid J84                           |
| TT-8     | 12.279       | 10.009       | TT-8 | Triakis tetrahedron                           |
| ETBPY-8  | 19.162       | 20.540       | D3h  | Elongated trigonalbipyramid                   |

**Table S12.** Hydrogen bond parameters found in complex **1**, (distances (Å), angles, (°)).

| <b>Donor–H···Acceptor</b> | <b>D–H</b> | <b>H···A</b> | <b>D···A</b> | <b>D–H···A</b> |
|---------------------------|------------|--------------|--------------|----------------|
| O5S–H5S···C11             | 0.93       | 2.18         | 3.089(3)     | 165            |
| O6S–H6S···C12             | 0.82       | 2.59         | 3.308(9)     | 147            |
| O7S–H7S···C12             | 0.82       | 2.74         | 3.169(7)     | 114            |

|               |           |         |          |        |
|---------------|-----------|---------|----------|--------|
| O3S–H3S···Cl2 | 0.809(19) | 2.36(2) | 3.160(3) | 171(5) |
| O4S–H4S···O7S | 0.83(2)   | 1.93(3) | 2.725(8) | 159(6) |

**Table S13.** Hydrogen bond parameters found in complex **2**, (distances (Å), angles, (°)).

| Donor–H···Acceptor | D–H       | H···A   | D···A    | D–H···A |
|--------------------|-----------|---------|----------|---------|
| O5S–H5SO···Cl1     | 0.88(2)   | 2.22(2) | 3.088(4) | 172(4)  |
| O3S–H3SO···Cl2     | 0.886(14) | 2.50(4) | 3.203(4) | 137(4)  |

**Table S14.** Hydrogen bond parameters found in complex **3**, (distances (Å), angles, (°)).

| Donor–H···Acceptor | D–H     | H···A   | D···A    | D–H···A |
|--------------------|---------|---------|----------|---------|
| O2W–H2W···Br1      | 0.82(4) | 2.46(3) | 3.236(6) | 159(6)  |
| O3W–H3W2···O5      | 0.80(3) | 2.39(6) | 3.061(9) | 141(9)  |

**Table S15.** Hydrogen bond parameters found in complex **4**, (distances (Å), angles, (°)).

| Donor–H···Acceptor | D–H  | H···A | D···A    | D–H···A |
|--------------------|------|-------|----------|---------|
| O11–H11C···Br2     | 0.75 | 2.54  | 3.249(3) | 157.0   |

**Table S16.** Electrochemical parameters for manganese complexes used in this study.

| Complexes | Redox I<br>( $E_{1/2}$ V vs. Fc/Fc <sup>+</sup> ) | Redox II<br>( $E_a$ V vs. Fc/Fc <sup>+</sup> ) | $i_c/i_p$<br>(1M H <sub>2</sub> O) | $i_c/i_p$<br>(0.2 M OH <sup>-</sup> ) |
|-----------|---------------------------------------------------|------------------------------------------------|------------------------------------|---------------------------------------|
| <b>1</b>  | -0.43                                             | 0.58                                           | 18.90                              | 24.00                                 |
| <b>2</b>  | -0.40                                             | 0.61                                           | 21.42                              | 29.46                                 |



|   |       |      |      |       |
|---|-------|------|------|-------|
| 3 | -0.39 | 0.40 | ———— | 22.17 |
| 4 | -0.40 | 0.38 | ———— | 20.80 |

**Table S17.** Over potential values of different complexes based on the OCP values.

| SL no. | complexes | Over potential, water<br>oxidation | Over potential, hydroxide<br>oxidation |
|--------|-----------|------------------------------------|----------------------------------------|
| 1      | Complex 1 | 569 mV                             | 822 mV                                 |
| 2      | Complex 2 | 557 mV                             | 851 mV                                 |
| 3      | Complex 3 | -                                  | 754 mV                                 |
| 4      | Complex 4 | -                                  | 741 mV                                 |

The detailed calculation is provided below:

Estimation of  $\text{EO}_2/\text{H}_2\text{O}$  based on  $\text{EH}^+/\text{H}_2$  measured by OCP:

The reduction potential for  $\text{O}_2/\text{H}_2\text{O}$  in DMF containing 1000mM water may be estimated using i) the standard aqueous cell potential for  $\text{O}_2 + \text{H}_2 \rightarrow \text{H}_2\text{O}$ , ii) the measurement of the open circuit potential (OCP) for  $\text{H}^+/\text{H}_2$  ( $\text{EH}^+/\text{H}_2$ ), and iii) the Gibbs free energy to transfer  $\text{H}_2\text{O}$  from  $\text{H}_2\text{O}$  to DMF. It may be calculated by the following equations:

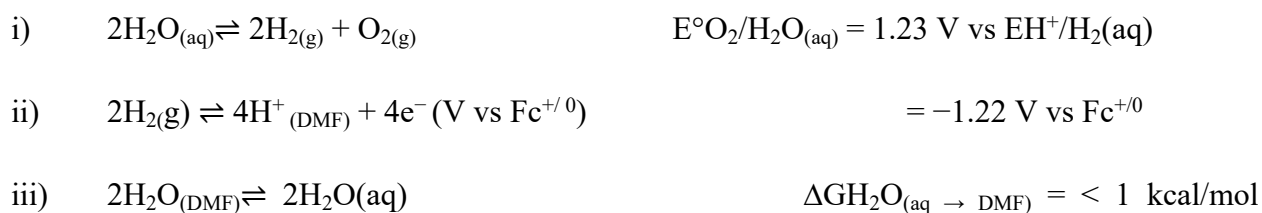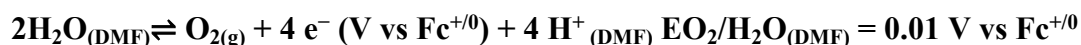

The reduction potential for  $\text{O}_2/\text{H}_2\text{O}$  in DMF containing 200 mM KOH may be estimated using i) the standard aqueous cell potential for  $\text{O}_2 + \text{H}_2 \rightarrow \text{H}_2\text{O}$ , ii) the measurement of the open circuit potential (OCP) for  $\text{H}^+/\text{H}_2$  ( $\text{EH}^+/\text{H}_2$ ), and iii) the Gibbs free energy to transfer  $\text{H}_2\text{O}$  from  $\text{H}_2\text{O}$  to DMF. It may be calculated by the following equations:

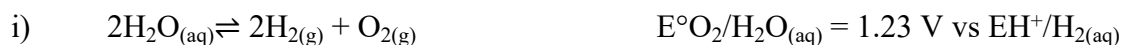

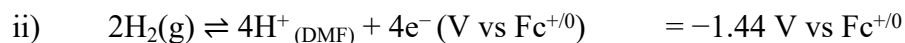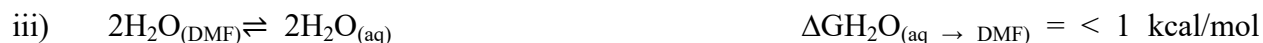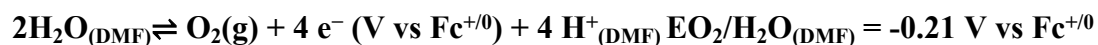

$$\text{Overpotential} = |E_{\text{cat}/2} - \text{EO}_2/\text{H}_2\text{O}_{(\text{DMF})}|$$

**Table S18.** OER half-wave potential of complexes with respect to NHE calculated using equation 3.<sup>1</sup>

| SL no. | complexes | $E_{\text{cat}/2}$ vs. NHE, water | $E_{\text{cat}/2}$ vs. NHE, hydroxide |
|--------|-----------|-----------------------------------|---------------------------------------|
|        |           | oxidation                         | oxidation                             |
| 1      | Complex 1 | 1.290 V                           | 1.323V                                |
| 2      | Complex 2 | 1.278 V                           | 1.352 V                               |
| 3      | Complex 3 | -                                 | 1.255 V                               |
| 4      | Complex 4 | -                                 | 1.242 V                               |

$$E_{\text{NHE}} = E_{\text{SCE}} + 0.241 \text{ V} \quad \text{equation 1}$$

$$E_{\text{Fc}/\text{Fc}^+} = 0.47 \text{ V vs. SCE} \quad \text{equation 2}$$

$$E_{\text{NHE}} = E_{\text{Fc}/\text{Fc}^+} + 0.241 \text{ V} + 0.47 \text{ V} \quad \text{equation 3}$$

1. N. G. Connelly, W. E. Geiger, *Chemical Reviews*, 1996, **96**, 877-910.
